# Supplementary material for: Development and Validation of a Prognostic Survival Model With Patient-Reported Outcomes for Patients With Cancer
Source: PubMed Central journal article supplement (PMC7113728; doi:10.1001/jamanetworkopen.2020.1768), 2020-04-01

## Supplementary Online Content

Seow H, Tanuseputro P, Barbera L, et al. Development and validation of a prognostic survival model with patient-reported outcomes for patients with cancer. *JAMA Netw Open*. 2020;3(4):e201768. doi:10.1001/jamanetworkopen.2020.1768

**eTable 1.** Baseline Characteristics of Development and Validation Cohorts at Each Year

**eTable 2.** Fully Adjusted Main Effects Model Associations for Development Cohort Following Backward Elimination for All Years

**eFigure 1.** Calibration Accuracy for 1-Year Survival

**eFigure 2.** Kaplan Meier Survival Curve When Patients Grouped by Quintiles of 1-Year Predicted Risk of Death

This supplementary material has been provided by the authors to give readers additional information about their work.

**eTable 1. Baseline Characteristics of Development and Validation Cohorts at Each Year**

|                                                         |                        | Y0                               | Y0                                 | Y1                               | Y1                                | Y2                               | Y2                                | Y3                              | Y3                                | Y4                              | Y4                                |
|---------------------------------------------------------|------------------------|----------------------------------|------------------------------------|----------------------------------|-----------------------------------|----------------------------------|-----------------------------------|---------------------------------|-----------------------------------|---------------------------------|-----------------------------------|
| Variable                                                | Total Cohort           | Cohort A (analysis)<br>N=153,296 | Cohort B (validation)<br>N=102,198 | Cohort A (analysis)<br>N=130,233 | Cohort B (validation)<br>N=86,822 | Cohort A (analysis)<br>N=110,893 | Cohort B (validation)<br>N=73,929 | Cohort A (analysis)<br>N=86,189 | Cohort B (validation)<br>N=57,460 | Cohort A (analysis)<br>N=65,741 | Cohort B (validation)<br>N=43,828 |
| Age at diagnosis                                        | Mean (SD)              | 63.66 ± 13.61                    | 63.54 ± 13.62                      | 63.72 ± 13.65                    | 63.73 ± 13.64                     | 64.11 ± 13.58                    | 64.19 ± 13.68                     | 64.71 ± 13.60                   | 64.69 ± 13.45                     | 65.25 ± 13.42                   | 65.27 ± 13.47                     |
|                                                         | Median (IQR)           | 65 (55-73)                       | 65 (55-73)                         | 65 (55-73)                       | 65 (55-73)                        | 65 (56-74)                       | 65 (56-74)                        | 66 (56-74)                      | 66 (56-74)                        | 66 (57-75)                      | 67 (57-75)                        |
| Sex                                                     | Female                 | 81,568 (53.2%)                   | 54,131 (53.0%)                     | 71,267 (54.7%)                   | 47,338 (54.5%)                    | 61,656 (55.6%)                   | 40,857 (55.3%)                    | 47,622 (55.3%)                  | 32,055 (55.8%)                    | 36,213 (55.1%)                  | 24,328 (55.5%)                    |
|                                                         | Male                   | 71,728 (46.8%)                   | 48,067 (47.0%)                     | 58,966 (45.3%)                   | 39,484 (45.5%)                    | 49,237 (44.4%)                   | 33,072 (44.7%)                    | 38,567 (44.7%)                  | 25,405 (44.2%)                    | 29,528 (44.9%)                  | 19,500 (44.5%)                    |
| Cancer type                                             | Breast                 | 30,855 (20.1%)                   | 20,719 (20.3%)                     | 30,504 (23.4%)                   | 19,901 (22.9%)                    | 27,883 (25.1%)                   | 18,803 (25.4%)                    | 22,327 (25.9%)                  | 15,130 (26.3%)                    | 17,483 (26.6%)                  | 11,618 (26.5%)                    |
|                                                         | Colorectal             | 16,776 (10.9%)                   | 11,142 (10.9%)                     | 14,975 (11.5%)                   | 10,071 (11.6%)                    | 12,737 (11.5%)                   | 8,566 (11.6%)                     | 9,871 (11.5%)                   | 6,471 (11.3%)                     | 7,429 (11.3%)                   | 4,928 (11.2%)                     |
|                                                         | Gynaecological         | 11,905 (7.8%)                    | 7,879 (7.7%)                       | 10,674 (8.2%)                    | 7,315 (8.4%)                      | 9,412 (8.5%)                     | 6,036 (8.2%)                      | 7,126 (8.3%)                    | 4,837 (8.4%)                      | 5,374 (8.2%)                    | 3,674 (8.4%)                      |
|                                                         | Head and Neck          | 6,843 (4.5%)                     | 4,415 (4.3%)                       | 5,888 (4.5%)                     | 3,928 (4.5%)                      | 4,978 (4.5%)                     | 3,320 (4.5%)                      | 3,740 (4.3%)                    | 2,574 (4.5%)                      | 2,872 (4.4%)                    | 1,818 (4.1%)                      |
|                                                         | Hematology             | 16,623 (10.8%)                   | 11,052 (10.8%)                     | 14,877 (11.4%)                   | 9,794 (11.3%)                     | 12,747 (11.5%)                   | 8,624 (11.7%)                     | 9,944 (11.5%)                   | 6,597 (11.5%)                     | 7,444 (11.3%)                   | 4,873 (11.1%)                     |
|                                                         | Lung                   | 19,111 (12.5%)                   | 12,604 (12.3%)                     | 10,720 (8.2%)                    | 7,054 (8.1%)                      | 6,744 (6.1%)                     | 4,468 (6.0%)                      | 4,291 (5.0%)                    | 2,769 (4.8%)                      | 2,802 (4.3%)                    | 1,904 (4.3%)                      |
|                                                         | Other                  | 14,158 (9.2%)                    | 9,397 (9.2%)                       | 11,868 (9.1%)                    | 8,024 (9.2%)                      | 10,061 (9.1%)                    | 6,707 (9.1%)                      | 7,732 (9.0%)                    | 5,150 (9.0%)                      | 5,701 (8.7%)                    | 3,968 (9.1%)                      |
|                                                         | Other Gastrointestinal | 11,824 (7.7%)                    | 7,879 (7.7%)                       | 6,904 (5.3%)                     | 4,674 (5.4%)                      | 4,609 (4.2%)                     | 2,959 (4.0%)                      | 3,083 (3.6%)                    | 1,998 (3.5%)                      | 2,040 (3.1%)                    | 1,392 (3.2%)                      |
|                                                         | Other Genitourinary    | 6,797 (4.4%)                     | 4,611 (4.5%)                       | 5,797 (4.5%)                     | 3,807 (4.4%)                      | 4,720 (4.3%)                     | 3,149 (4.3%)                      | 3,649 (4.2%)                    | 2,429 (4.2%)                      | 2,708 (4.1%)                    | 1,833 (4.2%)                      |
|                                                         | Prostate               | 18,404 (12.0%)                   | 12,500 (12.2%)                     | 18,026 (13.8%)                   | 12,254 (14.1%)                    | 17,002 (15.3%)                   | 11,297 (15.3%)                    | 14,426 (16.7%)                  | 9,505 (16.5%)                     | 11,888 (18.1%)                  | 7,820 (17.8%)                     |
| Cancer stage                                            | Stage 1                | 32,505 (21.2%)                   | 21,557 (21.1%)                     | 31,646 (24.3%)                   | 21,024 (24.2%)                    | 29,323 (26.4%)                   | 19,597 (26.5%)                    | 24,066 (27.9%)                  | 16,327 (28.4%)                    | 18,845 (28.7%)                  | 12,587 (28.7%)                    |
|                                                         | Stage 2                | 34,453 (22.5%)                   | 23,179 (22.7%)                     | 33,180 (25.5%)                   | 22,205 (25.6%)                    | 30,328 (27.3%)                   | 20,314 (27.5%)                    | 24,902 (28.9%)                  | 16,484 (28.7%)                    | 19,704 (30.0%)                  | 13,144 (30.0%)                    |
|                                                         | Stage 3                | 24,624 (16.1%)                   | 16,581 (16.2%)                     | 21,264 (16.3%)                   | 14,318 (16.5%)                    | 17,684 (15.9%)                   | 11,776 (15.9%)                    | 13,516 (15.7%)                  | 9,078 (15.8%)                     | 10,162 (15.5%)                  | 6,739 (15.4%)                     |
|                                                         | Stage 4                | 22,990 (15.0%)                   | 15,277 (14.9%)                     | 12,633 (9.7%)                    | 8,388 (9.7%)                      | 7,950 (7.2%)                     | 5,181 (7.0%)                      | 5,111 (5.9%)                    | 3,290 (5.7%)                      | 3,415 (5.2%)                    | 2,176 (5.0%)                      |
|                                                         | Unknown                | 38,724 (25.3%)                   | 25,604 (25.1%)                     | 31,510 (24.2%)                   | 20,887 (24.1%)                    | 25,608 (23.1%)                   | 17,061 (23.1%)                    | 18,594 (21.6%)                  | 12,281 (21.4%)                    | 13,615 (20.7%)                  | 9,182 (21.0%)                     |
| Radiation in last +3 months                             | No                     | 115,715 (75.5%)                  | 77,042 (75.4%)                     | 116,247 (89.3%)                  | 77,741 (89.5%)                    | 106,463 (96.0%)                  | 70,990 (96.0%)                    | 83,397 (96.8%)                  | 55,609 (96.8%)                    | 63,907 (97.2%)                  | 42,669 (97.4%)                    |
|                                                         | Yes                    | 37,581 (24.5%)                   | 25,156 (24.6%)                     | 13,986 (10.7%)                   | 9,081 (10.5%)                     | 4,430 (4.0%)                     | 2,939 (4.0%)                      | 2,792 (3.2%)                    | 1,851 (3.2%)                      | 1,834 (2.8%)                    | 1,159 (2.6%)                      |
| Chemotherapy in last +3 months                          | No                     | 111,810 (72.9%)                  | 74,529 (72.9%)                     | 106,520 (81.8%)                  | 70,975 (81.7%)                    | 96,710 (87.2%)                   | 64,506 (87.3%)                    | 76,971 (89.3%)                  | 51,166 (89.0%)                    | 59,284 (90.2%)                  | 39,537 (90.2%)                    |
|                                                         | Yes                    | 41,486 (27.1%)                   | 27,669 (27.1%)                     | 23,713 (18.2%)                   | 15,847 (18.3%)                    | 14,183 (12.8%)                   | 9,423 (12.7%)                     | 9,218 (10.7%)                   | 6,294 (11.0%)                     | 6,457 (9.8%)                    | 4,291 (9.8%)                      |
| Cancer surgery in last +3 months                        | No                     | 81,817 (53.4%)                   | 54,571 (53.4%)                     | 120,650 (92.6%)                  | 80,523 (92.7%)                    | 105,021 (94.7%)                  | 70,014 (94.7%)                    | 82,232 (95.4%)                  | 54,749 (95.3%)                    | 62,884 (95.7%)                  | 41,921 (95.6%)                    |
|                                                         | Yes                    | 71,479 (46.6%)                   | 47,627 (46.6%)                     | 9,583 (7.4%)                     | 6,299 (7.3%)                      | 5,872 (5.3%)                     | 3,915 (5.3%)                      | 3,957 (4.6%)                    | 2,711 (4.7%)                      | 2,857 (4.3%)                    | 1,907 (4.4%)                      |
| Past radiation (btwn index and -3mos from present date) | No                     | N/A                              | N/A                                | 72,666 (55.8%)                   | 48,697 (56.1%)                    | 57,301 (51.7%)                   | 38,053 (51.5%)                    | 42,870 (49.7%)                  | 28,639 (49.8%)                    | 31,536 (48.0%)                  | 21,055 (48.0%)                    |
|                                                         | Yes                    | N/A                              | N/A                                | 57,567 (44.2%)                   | 38,125 (43.9%)                    | 53,592 (48.3%)                   | 35,876 (48.5%)                    | 43,319 (50.3%)                  | 28,821 (50.2%)                    | 34,205 (52.0%)                  | 22,773 (52.0%)                    |

|                                                       |                |                 |                |                 |                |                |                |                |                |                |                |
|-------------------------------------------------------|----------------|-----------------|----------------|-----------------|----------------|----------------|----------------|----------------|----------------|----------------|----------------|
| Past chemo (btwn index and -3mos from present date)   | No             | N/A             | N/A            | 81,417 (62.5%)  | 54,304 (62.5%) | 67,910 (61.2%) | 45,210 (61.2%) | 53,200 (61.7%) | 35,434 (61.7%) | 40,541 (61.7%) | 27,111 (61.9%) |
|                                                       | Yes            | N/A             | N/A            | 48,816 (37.5%)  | 32,518 (37.5%) | 42,983 (38.8%) | 28,719 (38.8%) | 32,989 (38.3%) | 22,026 (38.3%) | 25,200 (38.3%) | 16,717 (38.1%) |
| Past surgery (btwn index and -3mos from present date) | No             | N/A             | N/A            | 49,301 (37.9%)  | 32,992 (38.0%) | 35,629 (32.1%) | 23,669 (32.0%) | 25,178 (29.2%) | 16,528 (28.8%) | 17,769 (27.0%) | 11,647 (26.6%) |
|                                                       | Yes            | N/A             | N/A            | 80,932 (62.1%)  | 53,830 (62.0%) | 75,264 (67.9%) | 50,260 (68.0%) | 61,011 (70.8%) | 40,932 (71.2%) | 47,972 (73.0%) | 32,181 (73.4%) |
| Distance from regional cancer centre                  | <=50 km        | 121,902 (79.5%) | 81,800 (80.0%) | 104,438 (80.2%) | 69,455 (80.0%) | 88,784 (80.1%) | 59,469 (80.4%) | 69,066 (80.1%) | 45,965 (80.0%) | 52,582 (80.0%) | 34,961 (79.8%) |
| Pt hospitalized in the past 3 months?                 | Yes            | 9,682 (6.3%)    | 6,369 (6.2%)   | 20,964 (16.1%)  | 14,022 (16.2%) | 12,895 (11.6%) | 8,610 (11.6%)  | 8,809 (10.2%)  | 5,855 (10.2%)  | 6,212 (9.4%)   | 4,166 (9.5%)   |
| Chronic Diseases                                      | AMI            | 546 (0.4%)      | 309 (0.3%)     | 580 (0.4%)      | 363 (0.4%)     | 306 (0.3%)     | 253 (0.3%)     | 223 (0.3%)     | 167 (0.3%)     | 193 (0.3%)     | 133 (0.3%)     |
|                                                       | Arrhythmia     | 11,210 (7.3%)   | 7,456 (7.3%)   | 9,263 (7.1%)    | 6,262 (7.2%)   | 8,259 (7.4%)   | 5,541 (7.5%)   | 6,822 (7.9%)   | 4,453 (7.7%)   | 5,344 (8.1%)   | 3,544 (8.1%)   |
|                                                       | Asthma         | 19,656 (12.8%)  | 12,885 (12.6%) | 17,223 (13.2%)  | 11,527 (13.3%) | 14,966 (13.5%) | 9,906 (13.4%)  | 11,605 (13.5%) | 7,807 (13.6%)  | 8,902 (13.5%)  | 5,980 (13.6%)  |
|                                                       | CHF            | 8,470 (5.5%)    | 5,695 (5.6%)   | 8,549 (6.6%)    | 5,624 (6.5%)   | 7,222 (6.5%)   | 4,959 (6.7%)   | 5,814 (6.7%)   | 3,858 (6.7%)   | 4,566 (6.9%)   | 2,973 (6.8%)   |
|                                                       | COPD           | 13,567 (8.9%)   | 9,048 (8.9%)   | 12,298 (9.4%)   | 8,135 (9.4%)   | 9,951 (9.0%)   | 6,462 (8.7%)   | 7,580 (8.8%)   | 5,015 (8.7%)   | 5,724 (8.7%)   | 3,830 (8.7%)   |
|                                                       | Coronary       | 22,576 (14.7%)  | 15,142 (14.8%) | 16,328 (12.5%)  | 10,710 (12.3%) | 14,129 (12.7%) | 9,240 (12.5%)  | 11,246 (13.0%) | 7,431 (12.9%)  | 8,697 (13.2%)  | 5,989 (13.7%)  |
|                                                       | Dementia       | 2,543 (1.7%)    | 1,613 (1.6%)   | 2,349 (1.8%)    | 1,593 (1.8%)   | 2,262 (2.0%)   | 1,573 (2.1%)   | 2,054 (2.4%)   | 1,384 (2.4%)   | 1,757 (2.7%)   | 1,158 (2.6%)   |
|                                                       | Diabetes       | 33,446 (21.8%)  | 22,630 (22.1%) | 29,838 (22.9%)  | 19,891 (22.9%) | 25,886 (23.3%) | 17,275 (23.4%) | 20,419 (23.7%) | 13,732 (23.9%) | 15,887 (24.2%) | 10,616 (24.2%) |
|                                                       | Hypertension   | 80,517 (52.5%)  | 53,525 (52.4%) | 71,059 (54.6%)  | 47,342 (54.5%) | 60,963 (55.0%) | 40,668 (55.0%) | 47,983 (55.7%) | 31,988 (55.7%) | 37,135 (56.5%) | 24,709 (56.4%) |
|                                                       | IBD            | 970 (0.6%)      | 660 (0.6%)     | 834 (0.6%)      | 512 (0.6%)     | 734 (0.7%)     | 471 (0.6%)     | 597 (0.7%)     | 386 (0.7%)     | 460 (0.7%)     | 307 (0.7%)     |
|                                                       | Mental health  | 5,630 (3.7%)    | 3,727 (3.6%)   | 5,281 (4.1%)    | 3,579 (4.1%)   | 4,388 (4.0%)   | 2,890 (3.9%)   | 3,242 (3.8%)   | 2,196 (3.8%)   | 2,392 (3.6%)   | 1,504 (3.4%)   |
|                                                       | Mood Disorder  | 18,966 (12.4%)  | 12,593 (12.3%) | 21,765 (16.7%)  | 14,409 (16.6%) | 17,778 (16.0%) | 11,864 (16.0%) | 11,322 (13.1%) | 7,434 (12.9%)  | 7,846 (11.9%)  | 5,008 (11.4%)  |
|                                                       | Osteoarthritis | 63,935 (41.7%)  | 42,318 (41.4%) | 45,381 (34.8%)  | 30,294 (34.9%) | 41,133 (37.1%) | 27,502 (37.2%) | 33,233 (38.6%) | 22,339 (38.9%) | 26,500 (40.3%) | 17,409 (39.7%) |
|                                                       | Osteoporosis   | 8,173 (5.3%)    | 5,359 (5.2%)   | 5,255 (4.0%)    | 3,483 (4.0%)   | 4,941 (4.5%)   | 3,348 (4.5%)   | 4,267 (5.0%)   | 2,776 (4.8%)   | 3,476 (5.3%)   | 2,330 (5.3%)   |
|                                                       | Renal disease  | 6,866 (4.5%)    | 4,558 (4.5%)   | 7,696 (5.9%)    | 4,980 (5.7%)   | 6,823 (6.2%)   | 4,533 (6.1%)   | 5,447 (6.3%)   | 3,708 (6.5%)   | 4,392 (6.7%)   | 2,854 (6.5%)   |
| Rheumatoid arthritis                                  | 2,846 (1.9%)   | 1,899 (1.9%)    | 2,414 (1.9%)   | 1,717 (2.0%)    | 2,181 (2.0%)   | 1,453 (2.0%)   | 1,697 (2.0%)   | 1,210 (2.1%)   | 1,340 (2.0%)   | 927 (2.1%)     |                |
| Stroke                                                | 4,243 (2.8%)   | 2,787 (2.7%)    | 3,123 (2.4%)   | 2,135 (2.5%)    | 2,799 (2.5%)   | 1,881 (2.5%)   | 2,334 (2.7%)   | 1,501 (2.6%)   | 1,794 (2.7%)   | 1,249 (2.8%)   |                |
| Functional score at index (+3 mo)                     | Missing        | 82,357 (53.7%)  | 54,649 (53.5%) | 76,800 (59.0%)  | 50,888 (58.6%) | 74,565 (67.2%) | 49,561 (67.0%) | 59,117 (68.6%) | 39,333 (68.5%) | 46,012 (70.0%) | 30,434 (69.4%) |
|                                                       | 0              | 34,314 (22.4%)  | 23,316 (22.8%) | 23,422 (18.0%)  | 15,685 (18.1%) | 18,088 (16.3%) | 12,205 (16.5%) | 14,248 (16.5%) | 9,570 (16.7%)  | 10,605 (16.1%) | 7,222 (16.5%)  |
|                                                       | 1              | 21,596 (14.1%)  | 14,429 (14.1%) | 20,281 (15.6%)  | 13,617 (15.7%) | 12,330 (11.1%) | 8,217 (11.1%)  | 8,703 (10.1%)  | 5,724 (10.0%)  | 6,099 (9.3%)   | 4,187 (9.6%)   |
|                                                       | 2              | 8,427 (5.5%)    | 5,487 (5.4%)   | 5,737 (4.4%)    | 3,985 (4.6%)   | 3,441 (3.1%)   | 2,300 (3.1%)   | 2,425 (2.8%)   | 1,703 (3.0%)   | 1,749 (2.7%)   | 1,157 (2.6%)   |
|                                                       | 3              | 4,893 (3.2%)    | 3,216 (3.1%)   | 2,994 (2.3%)    | 1,973 (2.3%)   | 1,824 (1.6%)   | 1,267 (1.7%)   | 1,272 (1.5%)   | 855 (1.5%)     | 977 (1.5%)     | 627 (1.4%)     |
|                                                       | 4              | 1,709 (1.1%)    | 1,101 (1.1%)   | 999 (0.8%)      | 674 (0.8%)     | 645 (0.6%)     | 379 (0.5%)     | 424 (0.5%)     | 275 (0.5%)     | 299 (0.5%)     | 201 (0.5%)     |
| Pain score at index (+3 mo)                           | Missing        | 62,049 (40.5%)  | 41,049 (40.2%) | 56,641 (43.5%)  | 37,734 (43.5%) | 62,853 (56.7%) | 41,599 (56.3%) | 52,411 (60.8%) | 35,030 (61.0%) | 42,978 (65.4%) | 28,473 (65.0%) |
|                                                       | 0              | 43,879 (28.6%)  | 29,311 (28.7%) | 38,905 (29.9%)  | 25,933 (29.9%) | 26,630 (24.0%) | 18,113 (24.5%) | 19,272 (22.4%) | 12,666 (22.0%) | 12,944 (19.7%) | 8,703 (19.9%)  |
|                                                       | 1              | 23,550 (15.4%)  | 16,078 (15.7%) | 19,891 (15.3%)  | 13,264 (15.3%) | 12,137 (10.9%) | 8,256 (11.2%)  | 8,213 (9.5%)   | 5,612 (9.8%)   | 5,686 (8.6%)   | 3,800 (8.7%)   |
|                                                       | 2              | 15,705 (10.2%)  | 10,374 (10.2%) | 9,827 (7.5%)    | 6,666 (7.7%)   | 6,248 (5.6%)   | 3,967 (5.4%)   | 4,228 (4.9%)   | 2,746 (4.8%)   | 2,753 (4.2%)   | 1,964 (4.5%)   |

|                                          |         |                |                |                |                |                |                |                |                |                |                |               |
|------------------------------------------|---------|----------------|----------------|----------------|----------------|----------------|----------------|----------------|----------------|----------------|----------------|---------------|
|                                          | 3       | 8,113 (5.3%)   | 5,386 (5.3%)   | 4,969 (3.8%)   | 3,225 (3.7%)   | 3,025 (2.7%)   | 1,994 (2.7%)   | 2,065 (2.4%)   | 1,406 (2.4%)   | 1,380 (2.1%)   | 888 (2.0%)     |               |
| <b>Wellbeing score at index (+3 mo)</b>  | Missing | 59,535 (38.8%) | 39,381 (38.5%) | 56,491 (43.4%) | 37,644 (43.4%) | 62,724 (56.6%) | 41,515 (56.2%) | 52,329 (60.7%) | 34,966 (60.9%) | 42,920 (65.3%) | 28,398 (64.8%) |               |
|                                          | 0       | 23,898 (15.6%) | 16,078 (15.7%) | 24,948 (19.2%) | 16,752 (19.3%) | 17,381 (15.7%) | 11,663 (15.8%) | 12,457 (14.5%) | 8,253 (14.4%)  | 8,417 (12.8%)  | 5,777 (13.2%)  |               |
|                                          | 1       | 35,305 (23.0%) | 23,905 (23.4%) | 28,141 (21.6%) | 18,821 (21.7%) | 18,337 (16.5%) | 12,435 (16.8%) | 13,036 (15.1%) | 13,036 (15.1%) | 8,618 (15.0%)  | 8,743 (13.3%)  | 5,939 (13.6%) |
|                                          | 2       | 23,941 (15.6%) | 15,868 (15.5%) | 14,848 (11.4%) | 9,796 (11.3%)  | 8,918 (8.0%)   | 5,941 (8.0%)   | 6,128 (7.1%)   | 4,053 (7.1%)   | 4,073 (6.2%)   | 4,073 (6.2%)   | 2,711 (6.2%)  |
|                                          | 3       | 10,617 (6.9%)  | 6,966 (6.8%)   | 5,805 (4.5%)   | 3,809 (4.4%)   | 3,533 (3.2%)   | 2,375 (3.2%)   | 2,239 (2.6%)   | 1,570 (2.7%)   | 1,588 (2.4%)   | 1,588 (2.4%)   | 1,003 (2.3%)  |
| <b>Dyspnea score at index (+3 mo)</b>    | Missing | 58,577 (38.2%) | 38,729 (37.9%) | 56,079 (43.1%) | 37,392 (43.1%) | 62,419 (56.3%) | 41,319 (55.9%) | 52,063 (60.4%) | 34,802 (60.6%) | 42,731 (65.0%) | 28,284 (64.5%) |               |
|                                          | 0       | 85,575 (55.8%) | 57,398 (56.2%) | 68,882 (52.9%) | 45,921 (52.9%) | 45,062 (40.6%) | 30,375 (41.1%) | 31,765 (36.9%) | 21,120 (36.8%) | 21,426 (32.6%) | 14,541 (33.2%) |               |
|                                          | 1       | 9,144 (6.0%)   | 6,071 (5.9%)   | 5,272 (4.0%)   | 3,509 (4.0%)   | 3,412 (3.1%)   | 2,235 (3.0%)   | 2,361 (2.7%)   | 1,538 (2.7%)   | 1,584 (2.4%)   | 1,003 (2.3%)   |               |
| <b>Depression score at index (+3 mo)</b> | Missing | 62,941 (41.1%) | 41,687 (40.8%) | 56,993 (43.8%) | 37,970 (43.7%) | 63,115 (56.9%) | 41,772 (56.5%) | 52,603 (61.0%) | 35,161 (61.2%) | 43,128 (65.6%) | 28,545 (65.1%) |               |
|                                          | 0       | 72,188 (47.1%) | 48,355 (47.3%) | 61,636 (47.3%) | 41,106 (47.3%) | 40,515 (36.5%) | 27,292 (36.9%) | 28,551 (33.1%) | 19,043 (33.1%) | 19,287 (29.3%) | 13,129 (30.0%) |               |
|                                          | 1       | 18,167 (11.9%) | 12,156 (11.9%) | 11,604 (8.9%)  | 7,746 (8.9%)   | 7,263 (6.5%)   | 4,865 (6.6%)   | 5,035 (5.8%)   | 3,256 (5.7%)   | 3,326 (5.1%)   | 2,154 (4.9%)   |               |
| <b>ESAS score at index (+3 mo)</b>       |         |                |                |                |                |                |                |                |                |                |                |               |
| <b>Tiredness</b>                         | Missing | 70,973 (46.3%) | 47,090 (46.1%) | 61,073 (46.9%) | 40,729 (46.9%) | 66,077 (59.6%) | 43,736 (59.2%) | 54,804 (63.6%) | 36,674 (63.8%) | 44,692 (68.0%) | 29,620 (67.6%) |               |
|                                          | Level 1 | 23,378 (15.3%) | 15,511 (15.2%) | 19,471 (15.0%) | 13,016 (15.0%) | 13,927 (12.6%) | 9,355 (12.7%)  | 10,191 (11.8%) | 6,599 (11.5%)  | 6,779 (10.3%)  | 4,619 (10.5%)  |               |
|                                          | Level 2 | 24,604 (16.0%) | 17,011 (16.6%) | 26,261 (20.2%) | 17,398 (20.0%) | 16,683 (15.0%) | 11,383 (15.4%) | 11,726 (13.6%) | 7,761 (13.5%)  | 7,860 (12.0%)  | 5,368 (12.2%)  |               |
|                                          | Level 3 | 20,327 (13.3%) | 13,339 (13.1%) | 14,758 (11.3%) | 10,002 (11.5%) | 9,202 (8.3%)   | 6,051 (8.2%)   | 6,137 (7.1%)   | 4,196 (7.3%)   | 4,142 (6.3%)   | 2,751 (6.3%)   |               |
|                                          | Level 4 | 14,014 (9.1%)  | 9,247 (9.0%)   | 8,670 (6.7%)   | 5,677 (6.5%)   | 5,004 (4.5%)   | 3,404 (4.6%)   | 3,331 (3.9%)   | 2,230 (3.9%)   | 2,268 (3.4%)   | 1,470 (3.4%)   |               |
| <b>Drowsiness</b>                        | Missing | 71,030 (46.3%) | 47,139 (46.1%) | 61,135 (46.9%) | 40,771 (47.0%) | 66,104 (59.6%) | 43,764 (59.2%) | 54,830 (63.6%) | 36,685 (63.8%) | 44,707 (68.0%) | 29,623 (67.6%) |               |
|                                          | Level 1 | 44,081 (28.8%) | 29,594 (29.0%) | 36,100 (27.7%) | 24,173 (27.8%) | 24,143 (21.8%) | 16,404 (22.2%) | 17,213 (20.0%) | 11,222 (19.5%) | 11,439 (17.4%) | 7,699 (17.6%)  |               |
|                                          | Level 2 | 19,545 (12.7%) | 13,307 (13.0%) | 20,012 (15.4%) | 13,370 (15.4%) | 12,876 (11.6%) | 8,545 (11.6%)  | 8,922 (10.4%)  | 6,046 (10.5%)  | 6,076 (9.2%)   | 4,154 (9.5%)   |               |
|                                          | Level 3 | 11,703 (7.6%)  | 7,572 (7.4%)   | 8,728 (6.7%)   | 5,765 (6.6%)   | 5,316 (4.8%)   | 3,528 (4.8%)   | 3,602 (4.2%)   | 2,416 (4.2%)   | 2,469 (3.8%)   | 1,629 (3.7%)   |               |
|                                          | Level 4 | 6,937 (4.5%)   | 4,586 (4.5%)   | 4,258 (3.3%)   | 2,743 (3.2%)   | 2,454 (2.2%)   | 1,688 (2.3%)   | 1,622 (1.9%)   | 1,091 (1.9%)   | 1,050 (1.6%)   | 723 (1.6%)     |               |
| <b>Nausea</b>                            | Missing | 70,993 (46.3%) | 47,092 (46.1%) | 61,106 (46.9%) | 40,747 (46.9%) | 66,114 (59.6%) | 43,758 (59.2%) | 54,822 (63.6%) | 36,689 (63.9%) | 44,703 (68.0%) | 29,629 (67.6%) |               |
|                                          | Level 1 | 65,054 (42.4%) | 43,679 (42.7%) | 56,019 (43.0%) | 37,259 (42.9%) | 36,926 (33.3%) | 24,892 (33.7%) | 26,032 (30.2%) | 17,226 (30.0%) | 17,592 (26.8%) | 11,950 (27.3%) |               |
|                                          | Level 2 | 10,698 (7.0%)  | 7,026 (6.9%)   | 9,270 (7.1%)   | 6,198 (7.1%)   | 5,649 (5.1%)   | 3,780 (5.1%)   | 3,910 (4.5%)   | 2,573 (4.5%)   | 2,490 (3.8%)   | 1,622 (3.7%)   |               |
|                                          | Level 3 | 4,221 (2.8%)   | 2,887 (2.8%)   | 2,721 (2.1%)   | 1,867 (2.2%)   | 1,592 (1.4%)   | 1,078 (1.5%)   | 1,003 (1.2%)   | 669 (1.2%)     | 689 (1.0%)     | 433 (1.0%)     |               |
|                                          | Level 4 | 2,330 (1.5%)   | 1,514 (1.5%)   | 1,117 (0.9%)   | 751 (0.9%)     | 612 (0.6%)     | 421 (0.6%)     | 422 (0.5%)     | 303 (0.5%)     | 267 (0.4%)     | 194 (0.4%)     |               |
| <b>Appetite</b>                          | Missing | 71,032 (46.3%) | 47,122 (46.1%) | 61,104 (46.9%) | 40,749 (46.9%) | 66,103 (59.6%) | 43,749 (59.2%) | 54,824 (63.6%) | 36,680 (63.8%) | 44,698 (68.0%) | 29,623 (67.6%) |               |
|                                          | Level 1 | 40,624 (26.5%) | 27,448 (26.9%) | 41,400 (31.8%) | 27,602 (31.8%) | 28,789 (26.0%) | 19,499 (26.4%) | 21,058 (24.4%) | 13,882 (24.2%) | 14,525 (22.1%) | 9,910 (22.6%)  |               |
|                                          | Level 2 | 17,402 (11.4%) | 11,691 (11.4%) | 15,101 (11.6%) | 10,015 (11.5%) | 8,981 (8.1%)   | 6,037 (8.2%)   | 5,865 (6.8%)   | 3,909 (6.8%)   | 3,722 (5.7%)   | 2,473 (5.6%)   |               |
|                                          | Level 3 | 14,364 (9.4%)  | 9,421 (9.2%)   | 8,402 (6.5%)   | 5,671 (6.5%)   | 4,826 (4.4%)   | 3,132 (4.2%)   | 3,039 (3.5%)   | 2,085 (3.6%)   | 1,890 (2.9%)   | 1,261 (2.9%)   |               |
|                                          | Level 4 | 9,874 (6.4%)   | 6,516 (6.4%)   | 4,226 (3.2%)   | 2,785 (3.2%)   | 2,194 (2.0%)   | 1,512 (2.0%)   | 1,403 (1.6%)   | 904 (1.6%)     | 906 (1.4%)     | 561 (1.3%)     |               |
| <b>Anxiety</b>                           | Missing | 71,030 (46.3%) | 47,105 (46.1%) | 61,106 (46.9%) | 40,753 (46.9%) | 66,106 (59.6%) | 43,762 (59.2%) | 54,827 (63.6%) | 36,681 (63.8%) | 44,708 (68.0%) | 29,621 (67.6%) |               |
|                                          | Level 1 | 26,933 (17.6%) | 18,120 (17.7%) | 33,408 (25.7%) | 22,238 (25.6%) | 22,348 (20.2%) | 15,087 (20.4%) | 16,025 (18.6%) | 10,583 (18.4%) | 10,809 (16.4%) | 7,325 (16.7%)  |               |

|                                               |                                          |                 |                |                 |                |                 |                |                |                |                |                |
|-----------------------------------------------|------------------------------------------|-----------------|----------------|-----------------|----------------|-----------------|----------------|----------------|----------------|----------------|----------------|
|                                               | Level 2                                  | 26,620 (17.4%)  | 17,829 (17.4%) | 22,308 (17.1%)  | 14,842 (17.1%) | 14,307 (12.9%)  | 9,637 (13.0%)  | 9,837 (11.4%)  | 6,570 (11.4%)  | 6,559 (10.0%)  | 4,482 (10.2%)  |
|                                               | Level 3                                  | 17,241 (11.2%)  | 11,540 (11.3%) | 9,140 (7.0%)    | 6,146 (7.1%)   | 5,578 (5.0%)    | 3,672 (5.0%)   | 3,726 (4.3%)   | 2,469 (4.3%)   | 2,514 (3.8%)   | 1,621 (3.7%)   |
|                                               | Level 4                                  | 11,472 (7.5%)   | 7,604 (7.4%)   | 4,271 (3.3%)    | 2,843 (3.3%)   | 2,554 (2.3%)    | 1,771 (2.4%)   | 1,774 (2.1%)   | 1,157 (2.0%)   | 1,151 (1.8%)   | 779 (1.8%)     |
| <b>1ry or 2ry caregiver lives with pt</b>     | Missing                                  | 144,069 (94.0%) | 96,092 (94.0%) | 124,105 (95.3%) | 82,652 (95.2%) | 107,379 (96.8%) | 71,551 (96.8%) | 83,892 (97.3%) | 55,849 (97.2%) | 64,207 (97.7%) | 42,756 (97.6%) |
|                                               | No                                       | 2,750 (1.8%)    | 1,843 (1.8%)   | 1,907 (1.5%)    | 1,345 (1.5%)   | 1,198 (1.1%)    | 853 (1.2%)     | 858 (1.0%)     | 577 (1.0%)     | 557 (0.8%)     | 391 (0.9%)     |
|                                               | Yes                                      | 6,311 (4.1%)    | 4,169 (4.1%)   | 4,092 (3.1%)    | 2,737 (3.2%)   | 2,226 (2.0%)    | 1,485 (2.0%)   | 1,389 (1.6%)   | 993 (1.7%)     | 945 (1.4%)     | 661 (1.5%)     |
|                                               | NA (i.e. does not have a 1-ry caregiver) | 166 (0.1%)      | 94 (0.1%)      | 129 (0.1%)      | 88 (0.1%)      | 90 (0.1%)       | 40 (0.1%)      | 50 (0.1%)      | 41 (0.1%)      | 32 (0.0%)      | 20 (0.0%)      |
| <b>Pt has regular primary care physician</b>  | No                                       | 3,635 (2.4%)    | 2,319 (2.3%)   | 1,701 (1.3%)    | 1,113 (1.3%)   | 1,698 (1.5%)    | 1,117 (1.5%)   | 1,655 (1.9%)   | 1,080 (1.9%)   | 1,320 (2.0%)   | 860 (2.0%)     |
|                                               | Rostered                                 | 126,357 (82.4%) | 84,473 (82.7%) | 109,559 (84.1%) | 72,980 (84.1%) | 94,190 (84.9%)  | 62,829 (85.0%) | 73,549 (85.3%) | 49,169 (85.6%) | 56,504 (85.9%) | 37,616 (85.8%) |
|                                               | Virtually rostered                       | 23,304 (15.2%)  | 15,406 (15.1%) | 18,973 (14.6%)  | 12,729 (14.7%) | 15,005 (13.5%)  | 9,983 (13.5%)  | 10,985 (12.7%) | 7,211 (12.5%)  | 7,917 (12.0%)  | 5,352 (12.2%)  |
| <b>Pt has received physician home visit</b>   | Yes                                      | 1,262 (0.8%)    | 842 (0.8%)     | 1,110 (0.9%)    | 748 (0.9%)     | 641 (0.6%)      | 417 (0.6%)     | 373 (0.4%)     | 248 (0.4%)     | 252 (0.4%)     | 165 (0.4%)     |
| <b>Pt had palliative care hospitalization</b> | Yes                                      | 10,172 (6.6%)   | 6,581 (6.4%)   | 7,557 (5.8%)    | 5,089 (5.9%)   | 4,280 (3.9%)    | 2,786 (3.8%)   | 2,543 (3.0%)   | 1,640 (2.9%)   | 1,662 (2.5%)   | 1,076 (2.5%)   |
| <b>Pt resides in LTC</b>                      | Yes                                      | 1,721 (1.1%)    | 1,096 (1.1%)   | 1,901 (1.5%)    | 1,346 (1.6%)   | 1,584 (1.4%)    | 1,072 (1.5%)   | 1,262 (1.5%)   | 839 (1.5%)     | 1,040 (1.6%)   | 690 (1.6%)     |
| <b>Pt had EoL homecare</b>                    | No                                       | 144,258 (94.1%) | 96,247 (94.2%) | 122,800 (94.3%) | 81,851 (94.3%) | 106,694 (96.2%) | 71,324 (96.5%) | 83,798 (97.2%) | 55,926 (97.3%) | 64,234 (97.7%) | 42,799 (97.7%) |
|                                               | Pt has nursing or personal support       | 9,038 (5.9%)    | 5,951 (5.8%)   | 7,433 (5.7%)    | 4,971 (5.7%)   | 4,199 (3.8%)    | 2,605 (3.5%)   | 2,391 (2.8%)   | 1,534 (2.7%)   | 1,507 (2.3%)   | 1,029 (2.3%)   |

**Table 2. Fully Adjusted Main Effects Model Associations for Development Cohort Following Backward Elimination for All Years [Outcome=time to death (in days)]**

| Year from death                              |                        | Y0       |        |              |            | Y1       |          |              |            | Y2       |        |              |            | Y3       |         |              |            | Y4       |         |              |            |
|----------------------------------------------|------------------------|----------|--------|--------------|------------|----------|----------|--------------|------------|----------|--------|--------------|------------|----------|---------|--------------|------------|----------|---------|--------------|------------|
| Parameter                                    | Level                  | Estimate | StdErr | Hazard ratio | Prob ChiSq | Estimate | StdErr   | Hazard ratio | Prob ChiSq | Estimate | StdErr | Hazard ratio | Prob ChiSq | Estimate | StdErr  | Hazard ratio | Prob ChiSq | Estimate | StdErr  | Hazard ratio | Prob ChiSq |
| <b>Age (centered)</b>                        | Age at indexdate       | 0.0267   | 0.0004 | 1.03         | <.0001     | 0.0286   | 4.75E-04 | 1.03         | <.0001     | 0.0302   | 0.0006 | 1.03         | <.0001     | 0.0320   | 0.0008  | 1.03         | <.0001     | 0.0335   | 0.0011  | 1.03         | <.0001     |
| <b>Age*Age</b>                               |                        | 0.0001   | 0.0000 | 1.00         | <.0001     | 0.0003   | 2.30E-05 | 1.00         | <.0001     | 0.0004   | 0.0000 | 1.00         | <.0001     | 0.0004   | 0.0000  | 1.00         | <.0001     | 0.0004   | 0.0001  | 1.00         | <.0001     |
| <b>Sex</b>                                   | Female                 | -0.1392  | 0.0099 | 0.87         | <.0001     | -0.1654  | 0.0130   | 0.85         | <.0001     | -0.1620  | 0.0178 | 0.85         | <.0001     | -0.1881  | 0.0233  | 0.83         | <.0001     | -0.1944  | 0.0308  | 0.82         | <.0001     |
| <b>Admitted to hospital in last 3 months</b> | Yes                    | 0.1583   | 0.0142 | 1.17         | <.0001     | 0.5015   | 0.0139   | 1.65         | <.0001     | 0.5670   | 0.0190 | 1.76         | <.0001     | 0.6645   | 0.0235  | 1.94         | <.0001     | 0.6640   | 0.0315  | 1.94         | <.0001     |
| <b>Chronic diseases</b>                      | AMI                    | N/A      | N/A    | N/A          | N/A        | N/A      | N/A      | N/A          | N/A        | N/A      | N/A    | N/A          | N/A        | N/A      | N/A     | N/A          | N/A        | N/A      | N/A     | N/A          | N/A        |
|                                              | Arrythmia              | N/A      | N/A    | N/A          | N/A        | 0.0411   | 0.0186   | 1.04         | 0.0273     | N/A      | N/A    | N/A          | N/A        | N/A      | N/A     | N/A          | N/A        | N/A      | N/A     | N/A          | N/A        |
|                                              | Asthma                 | -0.0593  | 0.0129 | 0.94         | <.0001     | N/A      | N/A      | N/A          | N/A        | -0.0625  | 0.0210 | 0.94         | 0.0029     | -0.0752  | 0.0267  | 0.93         | 0.0048     | N/A      | N/A     | N/A          | N/A        |
|                                              | CHF                    | 0.1893   | 0.0153 | 1.21         | <.0001     | 0.1978   | 0.0180   | 1.22         | <.0001     | 0.2643   | 0.0222 | 1.30         | <.0001     | 0.2936   | 0.0274  | 1.34         | <.0001     | 0.3466   | 0.0346  | 1.41         | <.0001     |
|                                              | COPD                   | 0.1757   | 0.0130 | 1.19         | <.0001     | 0.2019   | 0.0156   | 1.22         | <.0001     | 0.2961   | 0.0208 | 1.35         | <.0001     | 0.3303   | 0.0263  | 1.39         | <.0001     | 0.3209   | 0.0326  | 1.38         | <.0001     |
|                                              | Coronary               | N/A      | N/A    | N/A          | N/A        | N/A      | N/A      | N/A          | N/A        | N/A      | N/A    | N/A          | N/A        | N/A      | N/A     | N/A          | N/A        | N/A      | N/A     | N/A          | N/A        |
|                                              | Dementia               | 0.1526   | 0.0258 | 1.17         | <.0001     | 0.2781   | 0.0297   | 1.32         | <.0001     | 0.3250   | 0.0351 | 1.38         | <.0001     | 0.3025   | 0.0400  | 1.35         | <.0001     | 0.4891   | 0.0483  | 1.63         | <.0001     |
|                                              | Diabetes               | 0.0435   | 0.0098 | 1.04         | <.0001     | 0.0451   | 0.0123   | 1.05         | 0.0002     | 0.0474   | 0.0160 | 1.05         | 0.0030     | 0.0818   | 0.0204  | 1.09         | <.0001     | N/A      | N/A     | N/A          | N/A        |
|                                              | Hypertension           | N/A      | N/A    | N/A          | N/A        | N/A      | N/A      | N/A          | N/A        | N/A      | N/A    | N/A          | N/A        | N/A      | N/A     | N/A          | N/A        | N/A      | N/A     | N/A          | N/A        |
|                                              | IBD                    | N/A      | N/A    | N/A          | N/A        | 0.1798   | 0.0630   | 1.20         | 0.0043     | N/A      | N/A    | N/A          | N/A        | N/A      | N/A     | N/A          | N/A        | N/A      | N/A     | N/A          | N/A        |
|                                              | Mental health          | N/A      | N/A    | N/A          | N/A        | N/A      | N/A      | N/A          | N/A        | N/A      | N/A    | N/A          | N/A        | 0.09105  | 0.04242 | 1.10         | 0.0318     | N/A      | N/A     | N/A          | N/A        |
|                                              | Mood Disorder          | -0.0392  | 0.0131 | 0.96         | 0.0027     | N/A      | N/A      | N/A          | N/A        | N/A      | N/A    | N/A          | N/A        | N/A      | N/A     | N/A          | N/A        | N/A      | N/A     | N/A          | N/A        |
|                                              | Osteoarthritis         | -0.0727  | 0.0088 | 0.93         | <.0001     | -0.0849  | 0.0115   | 0.92         | <.0001     | -0.1103  | 0.0149 | 0.90         | <.0001     | -0.1252  | 0.0191  | 0.88         | <.0001     | -0.07161 | 0.02446 | 0.93         | 0.0034     |
|                                              | Osteoporosis           | -0.0536  | 0.0185 | 0.95         | 0.0038     | -0.0860  | 0.0276   | 0.92         | 0.0018     | -0.0754  | 0.0347 | 0.93         | 0.0300     | -0.1243  | 0.0421  | 0.88         | 0.0032     | N/A      | N/A     | N/A          | N/A        |
|                                              | Renal disease          | 0.1382   | 0.0172 | 1.15         | <.0001     | 0.1595   | 0.0186   | 1.17         | <.0001     | 0.2442   | 0.0230 | 1.28         | <.0001     | 0.2317   | 0.0288  | 1.26         | <.0001     | 0.23207  | 0.03544 | 1.26         | <.0001     |
|                                              | Rheumatoid arthritis   | 0.0837   | 0.0278 | 1.09         | 0.0026     | N/A      | N/A      | N/A          | N/A        | N/A      | N/A    | N/A          | N/A        | 0.16964  | 0.05748 | 1.19         | 0.0032     | N/A      | N/A     | N/A          | N/A        |
|                                              | Stroke                 | 0.1167   | 0.0212 | 1.12         | <.0001     | 0.0727   | 0.0285   | 1.08         | 0.0108     | 0.1258   | 0.0352 | 1.13         | 0.0003     | 0.1491   | 0.0429  | 1.16         | 0.0005     | N/A      | N/A     | N/A          | N/A        |
| <b>Cancer type (ref=lung)*</b>               | Prostate               | -2.0793  | 0.0888 | .            | <.0001     | -1.9389  | 0.0967   | .            | <.0001     | -1.7970  | 0.1125 | .            | <.0001     | -1.5953  | 0.1367  | .            | <.0001     | -1.5414  | 0.1770  | .            | <.0001     |
|                                              | Other Genitourinary    | -0.7660  | 0.0743 | .            | <.0001     | -0.7263  | 0.0798   | .            | <.0001     | -0.7355  | 0.0952 | .            | <.0001     | -0.6226  | 0.1181  | .            | <.0001     | -0.7979  | 0.1396  | .            | <.0001     |
|                                              | Other Gastrointestinal | 0.0079   | 0.0570 | .            | 0.8905     | -0.0534  | 0.0675   | .            | 0.4291     | -0.0542  | 0.0857 | .            | 0.5268     | 0.0568   | 0.1069  | .            | 0.5952     | 0.0198   | 0.1356  | .            | 0.8840     |
|                                              | Other                  | -1.0549  | 0.0598 | .            | <.0001     | -0.8944  | 0.0647   | .            | <.0001     | -0.7753  | 0.0771 | .            | <.0001     | -0.6180  | 0.0938  | .            | <.0001     | -0.5226  | 0.1169  | .            | <.0001     |
|                                              | Hematology             | -1.0768  | 0.0923 | .            | <.0001     | -1.0423  | 0.1003   | .            | <.0001     | -0.8451  | 0.1133 | .            | <.0001     | -0.7160  | 0.1364  | .            | <.0001     | -0.8673  | 0.1786  | .            | <.0001     |
|                                              | Head and Neck          | -0.9271  | 0.0731 | .            | <.0001     | -0.8124  | 0.0814   | .            | <.0001     | -0.6582  | 0.0959 | .            | <.0001     | -0.5241  | 0.1133  | .            | <.0001     | -0.5561  | 0.1424  | .            | <.0001     |
|                                              | Gynaecological         | -1.0148  | 0.0481 | .            | <.0001     | -0.8141  | 0.0522   | .            | <.0001     | -0.6837  | 0.0610 | .            | <.0001     | -0.6444  | 0.0785  | .            | <.0001     | -0.6521  | 0.0987  | .            | <.0001     |

|                                                         |                                           |         |        |   |        |         |        |   |        |         |        |   |        |         |        |   |        |         |        |   |        |
|---------------------------------------------------------|-------------------------------------------|---------|--------|---|--------|---------|--------|---|--------|---------|--------|---|--------|---------|--------|---|--------|---------|--------|---|--------|
|                                                         | Colorectal                                | -0.7025 | 0.0519 | . | <.0001 | -0.6671 | 0.0575 | . | <.0001 | -0.5464 | 0.0673 | . | <.0001 | -0.3803 | 0.0807 | . | <.0001 | -0.4595 | 0.1001 | . | <.0001 |
|                                                         | Breast                                    | -1.8515 | 0.0471 | . | <.0001 | -1.6542 | 0.0502 | . | <.0001 | -1.5456 | 0.0597 | . | <.0001 | -1.3351 | 0.0721 | . | <.0001 | -1.1950 | 0.0879 | . | <.0001 |
| <b>Cancer stage (ref=stage 1)*</b>                      | Unk                                       | 0.7022  | 0.0407 | . | <.0001 | 0.3113  | 0.0524 | . | <.0001 | 0.2442  | 0.0712 | . | 0.0006 | 0.0168  | 0.0942 | . | 0.8586 | 0.1756  | 0.1260 | . | 0.1633 |
|                                                         | 4                                         | 1.1931  | 0.0294 | . | <.0001 | 0.6277  | 0.0377 | . | <.0001 | 0.2925  | 0.0539 | . | <.0001 | 0.3471  | 0.0805 | . | <.0001 | -0.0384 | 0.1149 | . | 0.7385 |
|                                                         | 3                                         | 0.8134  | 0.0312 | . | <.0001 | 0.4474  | 0.0382 | . | <.0001 | 0.2173  | 0.0512 | . | <.0001 | 0.2332  | 0.0715 | . | 0.0011 | -0.1633 | 0.1017 | . | 0.1081 |
|                                                         | 2                                         | 0.4030  | 0.0417 | . | <.0001 | 0.1801  | 0.0498 | . | 0.0003 | -0.0224 | 0.0661 | . | 0.7346 | 0.0113  | 0.0890 | . | 0.8986 | 0.0558  | 0.1190 | . | 0.6389 |
| <b>Cancer stage : cancer type (ref=lung : stage 1)*</b> |                                           |         |        |   |        |         |        |   |        |         |        |   |        |         |        |   |        |         |        |   |        |
|                                                         | cancer_stage Unk * Prostate               | 0.8261  | 0.1123 | . | <.0001 | 1.0522  | 0.1245 | . | <.0001 | 1.0075  | 0.1486 | . | <.0001 | 1.2284  | 0.1832 | . | <.0001 | 0.6627  | 0.2459 | . | 0.0070 |
|                                                         | cancer_stage Unk * Other Genitourinary    | 0.3318  | 0.0844 | . | <.0001 | 0.4620  | 0.0954 | . | <.0001 | 0.3772  | 0.1193 | . | 0.0016 | 0.5636  | 0.1511 | . | 0.0002 | 0.4888  | 0.1888 | . | 0.0096 |
|                                                         | cancer_stage Unk * Other Gastrointestinal | 0.0662  | 0.0670 | . | 0.3233 | 0.0731  | 0.0840 | . | 0.3842 | -0.0376 | 0.1122 | . | 0.7376 | 0.0776  | 0.1461 | . | 0.5956 | -0.1414 | 0.1943 | . | 0.4667 |
|                                                         | cancer_stage Unk * Other                  | 0.7636  | 0.0693 | . | <.0001 | 0.7242  | 0.0804 | . | <.0001 | 0.4933  | 0.1026 | . | <.0001 | 0.5941  | 0.1299 | . | <.0001 | 0.1990  | 0.1687 | . | 0.2381 |
|                                                         | cancer_stage Unk * Hematology             | 0.1194  | 0.0984 | . | 0.225  | 0.3308  | 0.1103 | . | 0.0027 | 0.2169  | 0.1302 | . | 0.0956 | 0.4232  | 0.1606 | . | 0.0084 | 0.3730  | 0.2123 | . | 0.0789 |
|                                                         | cancer_stage Unk * Head and Neck          | 0.2159  | 0.0860 | . | 0.012  | 0.3774  | 0.1017 | . | 0.0002 | 0.2346  | 0.1275 | . | 0.0656 | 0.4129  | 0.1585 | . | 0.0092 | 0.3781  | 0.2062 | . | 0.0668 |
|                                                         | cancer_stage Unk * Gynaecological         | 0.4857  | 0.0658 | . | <.0001 | 0.6265  | 0.0784 | . | <.0001 | 0.4544  | 0.1020 | . | <.0001 | 0.6002  | 0.1340 | . | <.0001 | 0.3969  | 0.1717 | . | 0.0208 |
|                                                         | cancer_stage Unk * Colorectal             | 0.0795  | 0.0764 | . | 0.2982 | 0.3465  | 0.0905 | . | 0.0001 | 0.2356  | 0.1161 | . | 0.0425 | 0.1785  | 0.1511 | . | 0.2377 | 0.2356  | 0.1912 | . | 0.2179 |
|                                                         | cancer_stage Unk * Breast                 | 0.8072  | 0.0753 | . | <.0001 | 0.8959  | 0.0867 | . | <.0001 | 0.8956  | 0.1074 | . | <.0001 | 0.9724  | 0.1336 | . | <.0001 | 0.6916  | 0.1711 | . | <.0001 |
|                                                         | cancer_stage 4 * Prostate                 | 1.0887  | 0.0951 | . | <.0001 | 1.3720  | 0.1049 | . | <.0001 | 1.4075  | 0.1267 | . | <.0001 | 1.1665  | 0.1620 | . | <.0001 | 1.4617  | 0.2165 | . | <.0001 |
|                                                         | cancer_stage 4 * Other Genitourinary      | 0.6675  | 0.0830 | . | <.0001 | 0.6934  | 0.0973 | . | <.0001 | 0.8658  | 0.1278 | . | <.0001 | 0.6434  | 0.1686 | . | 0.0001 | 0.9033  | 0.2259 | . | <.0001 |
|                                                         | cancer_stage 4 * Other Gastrointestinal   | 0.0950  | 0.0613 | . | 0.1213 | 0.1055  | 0.0797 | . | 0.1857 | 0.0329  | 0.1153 | . | 0.7757 | -0.2047 | 0.1594 | . | 0.1990 | 0.1302  | 0.2240 | . | 0.5610 |
|                                                         | cancer_stage 4 * Other                    | 0.6712  | 0.0751 | . | <.0001 | 0.7634  | 0.0930 | . | <.0001 | 0.6368  | 0.1303 | . | <.0001 | 0.3868  | 0.1833 | . | 0.0348 | 0.5207  | 0.2660 | . | 0.0503 |
|                                                         | cancer_stage 4 * Hematology               | -0.3104 | 0.1041 | . | 0.0029 | -0.0913 | 0.1186 | . | 0.4414 | -0.0585 | 0.1445 | . | 0.6859 | -0.0679 | 0.1775 | . | 0.7021 | 0.4674  | 0.2307 | . | 0.0428 |
|                                                         | cancer_stage 4 * Head and Neck            | -0.1505 | 0.0816 | . | 0.0652 | 0.2068  | 0.0951 | . | 0.0297 | 0.2871  | 0.1191 | . | 0.0159 | -0.0613 | 0.1534 | . | 0.6896 | 0.5096  | 0.1982 | . | 0.0101 |
|                                                         | cancer_stage 4 * Gynaecological           | 0.7880  | 0.0623 | . | <.0001 | 0.9885  | 0.0764 | . | <.0001 | 0.6694  | 0.1053 | . | <.0001 | 0.7348  | 0.1576 | . | <.0001 | 1.0518  | 0.2263 | . | <.0001 |
|                                                         | cancer_stage 4 * Colorectal               | 0.5380  | 0.0566 | . | <.0001 | 0.6991  | 0.0657 | . | <.0001 | 0.8093  | 0.0843 | . | <.0001 | 0.6022  | 0.1143 | . | <.0001 | 0.9047  | 0.1594 | . | <.0001 |
|                                                         | cancer_stage 4 * Breast                   | 1.2945  | 0.0597 | . | <.0001 | 1.4229  | 0.0677 | . | <.0001 | 1.4730  | 0.0863 | . | <.0001 | 1.1878  | 0.1159 | . | <.0001 | 1.1296  | 0.1580 | . | <.0001 |
|                                                         | cancer_stage 3 * Prostate                 | -0.3055 | 0.1096 | . | 0.0053 | 0.1914  | 0.1168 | . | 0.1013 | 0.4066  | 0.1369 | . | 0.0030 | 0.4518  | 0.1651 | . | 0.0062 | 0.9395  | 0.2125 | . | <.0001 |
|                                                         | cancer_stage 3 * Other Genitourinary      | 0.3100  | 0.0976 | . | 0.0015 | 0.5083  | 0.1078 | . | <.0001 | 0.6123  | 0.1364 | . | <.0001 | 0.4749  | 0.1766 | . | 0.0072 | 0.8612  | 0.2304 | . | 0.0002 |
|                                                         | cancer_stage 3 * Other Gastrointestinal   | 0.0876  | 0.0665 | . | 0.1877 | 0.1409  | 0.0828 | . | 0.0890 | 0.2340  | 0.1141 | . | 0.0402 | -0.0935 | 0.1612 | . | 0.5621 | 0.3244  | 0.2136 | . | 0.1289 |
|                                                         | cancer_stage 3 * Other                    | 0.3740  | 0.0786 | . | <.0001 | 0.4995  | 0.0880 | . | <.0001 | 0.5468  | 0.1093 | . | <.0001 | 0.3743  | 0.1410 | . | 0.0079 | 0.5281  | 0.1903 | . | 0.0055 |
|                                                         | cancer_stage 3 * Hematology               | -0.1611 | 0.1135 | . | 0.1559 | 0.0268  | 0.1254 | . | 0.8309 | 0.0114  | 0.1501 | . | 0.9395 | 0.0235  | 0.1904 | . | 0.9016 | 0.4671  | 0.2414 | . | 0.0530 |
|                                                         | cancer_stage 3 * Head and Neck            | -0.1653 | 0.0954 | . | 0.0832 | 0.1691  | 0.1109 | . | 0.1274 | 0.1835  | 0.1376 | . | 0.1824 | 0.1624  | 0.1722 | . | 0.3456 | 0.5350  | 0.2195 | . | 0.0148 |

|                                         |              |         |        |      |        |         |        |      |        |         |        |      |        |         |        |      |        |         |        |      |        |
|-----------------------------------------|--------------|---------|--------|------|--------|---------|--------|------|--------|---------|--------|------|--------|---------|--------|------|--------|---------|--------|------|--------|
| cancer_stage 3 * Gynaecological         |              | 0.7298  | 0.0578 | .    | <.0001 | 0.8016  | 0.0653 | .    | <.0001 | 0.8317  | 0.0810 | .    | <.0001 | 0.7638  | 0.1086 | .    | <.0001 | 0.7485  | 0.1511 | .    | <.0001 |
| cancer_stage 3 * Colorectal             |              | -0.4427 | 0.0591 | .    | <.0001 | -0.1824 | 0.0668 | .    | 0.0063 | -0.0315 | 0.0816 | .    | 0.6994 | -0.1459 | 0.1036 | .    | 0.1594 | 0.2072  | 0.1377 | .    | 0.1323 |
| cancer_stage 3 * Breast                 |              | 0.7947  | 0.0578 | .    | <.0001 | 0.9299  | 0.0628 | .    | <.0001 | 1.2190  | 0.0768 | .    | <.0001 | 0.9676  | 0.0989 | .    | <.0001 | 1.1345  | 0.1314 | .    | <.0001 |
| cancer_stage 2 * Prostate               |              | 0.0945  | 0.0983 | .    | 0.3362 | 0.3693  | 0.1078 | .    | 0.0006 | 0.5805  | 0.1285 | .    | <.0001 | 0.5279  | 0.1593 | .    | 0.0009 | 0.5131  | 0.2075 | .    | 0.0134 |
| cancer_stage 2 * Other Genitourinary    |              | 0.6397  | 0.0979 | .    | <.0001 | 0.5083  | 0.1100 | .    | <.0001 | 0.7398  | 0.1391 | .    | <.0001 | 0.6317  | 0.1754 | .    | 0.0003 | 0.5816  | 0.2281 | .    | 0.0108 |
| cancer_stage 2 * Other Gastrointestinal |              | 0.1916  | 0.0731 | .    | 0.0087 | 0.3607  | 0.0871 | .    | <.0001 | 0.3849  | 0.1155 | .    | 0.0009 | 0.1859  | 0.1524 | .    | 0.2225 | -0.0920 | 0.2016 | .    | 0.6484 |
| cancer_stage 2 * Other                  |              | 0.3464  | 0.0822 | .    | <.0001 | 0.4243  | 0.0916 | .    | <.0001 | 0.5498  | 0.1124 | .    | <.0001 | 0.4939  | 0.1421 | .    | 0.0005 | 0.0410  | 0.1901 | .    | 0.8294 |
| cancer_stage 2 * Hematology             |              | -0.2168 | 0.1251 | .    | 0.0831 | -0.1698 | 0.1397 | .    | 0.2243 | -0.1956 | 0.1722 | .    | 0.2560 | -0.1328 | 0.2073 | .    | 0.5218 | -0.3358 | 0.2813 | .    | 0.2327 |
| cancer_stage 2 * Head and Neck          |              | -0.0218 | 0.1027 | .    | 0.8318 | 0.1975  | 0.1165 | .    | 0.0901 | 0.3601  | 0.1395 | .    | 0.0098 | 0.0930  | 0.1721 | .    | 0.5891 | 0.1859  | 0.2201 | .    | 0.3982 |
| cancer_stage 2 * Gynaecological         |              | 0.1929  | 0.0806 | .    | 0.0168 | 0.3192  | 0.0888 | .    | 0.0003 | 0.3940  | 0.1104 | .    | 0.0004 | 0.4099  | 0.1415 | .    | 0.0038 | 0.2346  | 0.1838 | .    | 0.2019 |
| cancer_stage 2 * Colorectal             |              | -0.3544 | 0.0691 | .    | <.0001 | -0.1018 | 0.0775 | .    | 0.1892 | 0.0171  | 0.0958 | .    | 0.8581 | -0.1065 | 0.1203 | .    | 0.3763 | -0.1015 | 0.1550 | .    | 0.5125 |
| cancer_stage 2 * Breast                 |              | 0.3814  | 0.0632 | .    | <.0001 | 0.4508  | 0.0694 | .    | <.0001 | 0.7290  | 0.0865 | .    | <.0001 | 0.6395  | 0.1100 | .    | <.0001 | 0.3241  | 0.1418 | .    | 0.0223 |
| Radiation                               | Yes          | 0.1105  | 0.0103 | 1.12 | <.0001 | 0.2821  | 0.0159 | 1.33 | <.0001 | 0.4955  | 0.0243 | 1.64 | <.0001 | 0.5025  | 0.0317 | 1.65 | <.0001 | 0.3885  | 0.0421 | 1.48 | <.0001 |
| Chemotherapy                            | Yes          | 0.0617  | 0.0101 | 1.06 | <.0001 | 0.3912  | 0.0148 | 1.48 | <.0001 | 0.6156  | 0.0206 | 1.85 | <.0001 | 0.7828  | 0.0266 | 2.19 | <.0001 | 0.7769  | 0.0351 | 2.18 | <.0001 |
| Surgery                                 | Yes          | -0.2672 | 0.0109 | 0.77 | <.0001 | -0.1238 | 0.0211 | 0.88 | <.0001 | -0.0737 | 0.0300 | 0.93 | 0.0140 | N/A     | N/A    | N/A  | N/A    | N/A     | N/A    | N/A  | N/A    |
| Previous Radiation                      | Yes          | N/A     | N/A    | N/A  | N/A    | N/A     | N/A    | N/A  | N/A    | 0.0439  | 0.0160 | 1.05 | 0.0060 | 0.0539  | 0.0204 | 1.06 | 0.0081 | 0.0766  | 0.0266 | 1.08 | 0.0039 |
| Previous Chemotherapy                   | Yes          | N/A     | N/A    | N/A  | N/A    | 0.1246  | 0.0136 | 1.13 | <.0001 | 0.0871  | 0.0179 | 1.09 | <.0001 | 0.0711  | 0.0228 | 1.07 | 0.0018 | 0.1212  | 0.0295 | 1.13 | <.0001 |
| Previous Surgery                        | Yes          | N/A     | N/A    | N/A  | N/A    | -0.2129 | 0.0135 | 0.81 | <.0001 | -0.1051 | 0.0180 | 0.90 | <.0001 | -0.0852 | 0.0237 | 0.92 | 0.0003 | -0.0759 | 0.0309 | 0.93 | 0.0141 |
| Distance from cancer centre             | Within 50 km | -0.0891 | 0.0101 | 0.92 | <.0001 | -0.0823 | 0.0131 | 0.92 | <.0001 | -0.0845 | 0.0170 | 0.92 | <.0001 | -0.0580 | 0.0222 | 0.94 | 0.0090 | -0.0630 | 0.0287 | 0.94 | 0.0282 |
| Pain score (ref=Level 0)                | NA           | 0.0163  | 0.0414 | 1.02 | 0.6944 | 0.0589  | 0.0791 | 1.06 | 0.4569 | -0.0890 | 0.0981 | 0.92 | 0.3642 | -0.3053 | 0.0822 | 0.74 | 0.0002 | -0.3887 | 0.1005 | 0.68 | 0.0001 |
|                                         | 3            | 0.1322  | 0.0178 | 1.14 | <.0001 | 0.1571  | 0.0253 | 1.17 | <.0001 | -0.0156 | 0.0344 | 0.99 | 0.6507 | 0.0472  | 0.0448 | 1.05 | 0.2919 | 0.0085  | 0.0590 | 1.01 | 0.8857 |
|                                         | 2            | 0.0964  | 0.0146 | 1.10 | <.0001 | 0.1057  | 0.0203 | 1.11 | <.0001 | 0.0675  | 0.0274 | 1.07 | 0.0137 | 0.0989  | 0.0356 | 1.10 | 0.0055 | -0.0418 | 0.0471 | 0.96 | 0.3746 |
|                                         | 1            | 0.0422  | 0.0135 | 1.04 | 0.0018 | 0.0523  | 0.0174 | 1.05 | 0.0026 | 0.0785  | 0.0238 | 1.08 | 0.0010 | 0.0415  | 0.0313 | 1.04 | 0.1843 | 0.1231  | 0.0410 | 1.13 | 0.0027 |
| Wellbeing score (ref=Level 0)           | NA           | 0.1816  | 0.0472 | 1.20 | 0.0001 | 0.1736  | 0.0674 | 1.19 | 0.0100 | 0.2031  | 0.0785 | 1.23 | 0.0097 | 0.1847  | 0.0837 | 1.20 | 0.0274 | 0.1287  | 0.0994 | 1.14 | 0.1956 |
|                                         | 3            | 0.1363  | 0.0206 | 1.15 | <.0001 | 0.0538  | 0.0285 | 1.06 | 0.0586 | 0.1970  | 0.0373 | 1.22 | <.0001 | 0.2102  | 0.0515 | 1.23 | <.0001 | 0.2057  | 0.0628 | 1.23 | 0.0011 |
|                                         | 2            | 0.0865  | 0.0169 | 1.09 | <.0001 | 0.0463  | 0.0222 | 1.05 | 0.0371 | 0.0983  | 0.0287 | 1.10 | 0.0006 | 0.1625  | 0.0397 | 1.18 | <.0001 | 0.0913  | 0.0498 | 1.10 | 0.0669 |
|                                         | 1            | 0.0520  | 0.0157 | 1.05 | 0.0009 | 0.0151  | 0.0190 | 1.02 | 0.4272 | 0.0305  | 0.0248 | 1.03 | 0.2189 | 0.0708  | 0.0337 | 1.07 | 0.0357 | 0.0123  | 0.0441 | 1.01 | 0.7799 |
| Dyspnea score (ref=Level 0)             | NA           | -0.3657 | 0.0589 | 0.69 | <.0001 | -0.3932 | 0.0986 | 0.68 | <.0001 | -0.2952 | 0.1164 | 0.74 | 0.0113 | N/A     | N/A    | N/A  | N/A    | N/A     | N/A    | N/A  | N/A    |
|                                         | 1            | 0.0338  | 0.0149 | 1.03 | 0.023  | 0.0358  | 0.0213 | 1.04 | 0.0921 | 0.0946  | 0.0281 | 1.10 | 0.0008 | N/A     | N/A    | N/A  | N/A    | N/A     | N/A    | N/A  | N/A    |
| Depression score (ref=Level 0)          | NA           | N/A     | N/A    | N/A  | N/A    | N/A     | N/A    | N/A  | N/A    | N/A     | N/A    | N/A  | N/A    | N/A     | N/A    | N/A  | N/A    | N/A     | N/A    | N/A  | N/A    |
|                                         | 1            | N/A     | N/A    | N/A  | N/A    | N/A     | N/A    | N/A  | N/A    | N/A     | N/A    | N/A  | N/A    | N/A     | N/A    | N/A  | N/A    | N/A     | N/A    | N/A  | N/A    |
|                                         | NA           | 0.0336  | 0.0142 | 1.03 | 0.0178 | 0.0534  | 0.0193 | 1.06 | 0.0056 | 0.0148  | 0.0259 | 1.02 | 0.5685 | -0.0218 | 0.0336 | 0.98 | 0.5162 | 0.0170  | 0.0501 | 1.02 | 0.7350 |



|                                                             |                                                    |         |        |      |        |         |        |      |        |         |        |      |        |         |        |      |        |         |        |      |        |
|-------------------------------------------------------------|----------------------------------------------------|---------|--------|------|--------|---------|--------|------|--------|---------|--------|------|--------|---------|--------|------|--------|---------|--------|------|--------|
| <b>Functional score (ref=Level 0)</b>                       | 4                                                  | 0.2690  | 0.0309 | 1.31 | <.0001 | 0.2813  | 0.0408 | 1.33 | <.0001 | 0.2825  | 0.0525 | 1.33 | <.0001 | -0.0023 | 0.0677 | 1.00 | 0.9730 | 0.1727  | 0.0839 | 1.19 | 0.0395 |
|                                                             | 3                                                  | 0.2629  | 0.0208 | 1.30 | <.0001 | 0.2047  | 0.0293 | 1.23 | <.0001 | 0.2032  | 0.0390 | 1.23 | <.0001 | 0.2113  | 0.0481 | 1.24 | <.0001 | 0.2613  | 0.0606 | 1.30 | <.0001 |
|                                                             | 2                                                  | 0.1381  | 0.0176 | 1.15 | <.0001 | 0.1331  | 0.0244 | 1.14 | <.0001 | 0.1743  | 0.0326 | 1.19 | <.0001 | 0.1171  | 0.0416 | 1.12 | 0.0049 | 0.3443  | 0.0518 | 1.41 | <.0001 |
|                                                             | 1                                                  | 0.0744  | 0.0146 | 1.08 | <.0001 | 0.0873  | 0.0198 | 1.09 | <.0001 | 0.1601  | 0.0262 | 1.17 | <.0001 | 0.1700  | 0.0328 | 1.19 | <.0001 | 0.3025  | 0.0427 | 1.35 | <.0001 |
| <b>anxiety (ref=Level 0)</b>                                | NA                                                 | 0.0057  | 0.1196 | 1.01 | 0.9619 | N/A     | N/A    | N/A  | N/A    | N/A     | N/A    | N/A  | N/A    | N/A     | N/A    | N/A  | N/A    | 0.0407  | 0.1394 | 1.04 | 0.7703 |
|                                                             | 3                                                  | -0.0961 | 0.0179 | 0.91 | <.0001 | N/A     | N/A    | N/A  | N/A    | N/A     | N/A    | N/A  | N/A    | N/A     | N/A    | N/A  | N/A    | 0.1162  | 0.0746 | 1.12 | 0.1194 |
|                                                             | 2                                                  | -0.0808 | 0.0155 | 0.92 | <.0001 | N/A     | N/A    | N/A  | N/A    | N/A     | N/A    | N/A  | N/A    | N/A     | N/A    | N/A  | N/A    | -0.0277 | 0.0543 | 0.97 | 0.6101 |
|                                                             | 1                                                  | -0.0601 | 0.0142 | 0.94 | <.0001 | N/A     | N/A    | N/A  | N/A    | N/A     | N/A    | N/A  | N/A    | N/A     | N/A    | N/A  | N/A    | 0.1084  | 0.0437 | 1.11 | 0.0131 |
| <b>appetite (ref=Level 0)</b>                               | NA                                                 | -0.0547 | 0.1125 | 0.95 | 0.6268 | 0.2035  | 0.0509 | 1.23 | <.0001 | 0.3962  | 0.0739 | 1.49 | <.0001 | 0.5324  | 0.1010 | 1.70 | <.0001 | 0.4499  | 0.1169 | 1.57 | 0.0001 |
|                                                             | 3                                                  | 0.3068  | 0.0181 | 1.36 | <.0001 | 0.2263  | 0.0293 | 1.25 | <.0001 | 0.1885  | 0.0420 | 1.21 | <.0001 | 0.2196  | 0.0554 | 1.25 | <.0001 | 0.2117  | 0.0706 | 1.24 | 0.0027 |
|                                                             | 2                                                  | 0.1982  | 0.0160 | 1.22 | <.0001 | 0.2058  | 0.0224 | 1.23 | <.0001 | 0.2440  | 0.0309 | 1.28 | <.0001 | 0.0803  | 0.0416 | 1.08 | 0.0534 | 0.2607  | 0.0538 | 1.30 | <.0001 |
|                                                             | 1                                                  | 0.1309  | 0.0155 | 1.14 | <.0001 | 0.1060  | 0.0191 | 1.11 | <.0001 | 0.1588  | 0.0263 | 1.17 | <.0001 | 0.1652  | 0.0346 | 1.18 | <.0001 | 0.1449  | 0.0468 | 1.16 | 0.0019 |
| <b>nausea (ref=Level 0)</b>                                 | NA                                                 | N/A     | N/A    | N/A  | N/A    | -0.0046 | 0.0623 | 1.00 | 0.9406 | -0.1378 | 0.0762 | 0.87 | 0.0704 | -0.4121 | 0.1378 | 0.66 | 0.0028 | -0.0192 | 0.1519 | 0.98 | 0.8992 |
|                                                             | 3                                                  | N/A     | N/A    | N/A  | N/A    | 0.1167  | 0.0464 | 1.12 | 0.0118 | 0.0782  | 0.0664 | 1.08 | 0.2392 | 0.1252  | 0.0907 | 1.13 | 0.1673 | 0.0744  | 0.1143 | 1.08 | 0.5152 |
|                                                             | 2                                                  | N/A     | N/A    | N/A  | N/A    | 0.0579  | 0.0302 | 1.06 | 0.0555 | 0.0649  | 0.0425 | 1.07 | 0.1267 | 0.0837  | 0.0587 | 1.09 | 0.1534 | 0.3587  | 0.0749 | 1.43 | <.0001 |
|                                                             | 1                                                  | N/A     | N/A    | N/A  | N/A    | 0.0585  | 0.0196 | 1.06 | 0.0029 | 0.0583  | 0.0273 | 1.06 | 0.0326 | 0.0358  | 0.0363 | 1.04 | 0.3248 | 0.0795  | 0.0484 | 1.08 | 0.1010 |
| <b>drowsiness (ref=Level 0)</b>                             | NA                                                 | -0.0427 | 0.1181 | 0.96 | 0.7179 | N/A     | N/A    | N/A  | N/A    | N/A     | N/A    | N/A  | N/A    | -0.2927 | 0.1412 | 0.75 | 0.0382 | N/A     | N/A    | N/A  | N/A    |
|                                                             | 3                                                  | 0.1688  | 0.0215 | 1.18 | <.0001 | N/A     | N/A    | N/A  | N/A    | N/A     | N/A    | N/A  | N/A    | -0.0867 | 0.0631 | 0.92 | 0.1692 | N/A     | N/A    | N/A  | N/A    |
|                                                             | 2                                                  | 0.0692  | 0.0174 | 1.07 | <.0001 | N/A     | N/A    | N/A  | N/A    | N/A     | N/A    | N/A  | N/A    | -0.1068 | 0.0458 | 0.90 | 0.0197 | N/A     | N/A    | N/A  | N/A    |
|                                                             | 1                                                  | 0.0106  | 0.0149 | 1.01 | 0.4804 | N/A     | N/A    | N/A  | N/A    | N/A     | N/A    | N/A  | N/A    | 0.0110  | 0.0356 | 1.01 | 0.7570 | N/A     | N/A    | N/A  | N/A    |
| <b>tiredness (ref=Level 0)</b>                              | NA                                                 | 0.2501  | 0.1364 | 1.28 | 0.0668 | 0.0509  | 0.0522 | 1.05 | 0.3290 | N/A     | N/A    | N/A  | N/A    | 0.4501  | 0.1103 | 1.57 | <.0001 | N/A     | N/A    | N/A  | N/A    |
|                                                             | 3                                                  | 0.2004  | 0.0228 | 1.22 | <.0001 | 0.0767  | 0.0289 | 1.08 | 0.0079 | N/A     | N/A    | N/A  | N/A    | 0.2045  | 0.0601 | 1.23 | 0.0007 | N/A     | N/A    | N/A  | N/A    |
|                                                             | 2                                                  | 0.1602  | 0.0194 | 1.17 | <.0001 | 0.0352  | 0.0247 | 1.04 | 0.1547 | N/A     | N/A    | N/A  | N/A    | 0.1496  | 0.0484 | 1.16 | 0.0020 | N/A     | N/A    | N/A  | N/A    |
|                                                             | 1                                                  | 0.0881  | 0.0179 | 1.09 | <.0001 | 0.0690  | 0.0217 | 1.07 | 0.0014 | N/A     | N/A    | N/A  | N/A    | 0.0944  | 0.0420 | 1.10 | 0.0244 | N/A     | N/A    | N/A  | N/A    |
| <b>Homecare (ref=pt has caregiver, does not live w/ pt)</b> | Missing                                            | -0.0527 | 0.0249 | 0.95 | 0.0345 | -0.0529 | 0.0321 | 0.95 | 0.0999 | 0.0018  | 0.0435 | 1.00 | 0.9676 | -0.0684 | 0.0536 | 0.93 | 0.2018 | N/A     | N/A    | N/A  | N/A    |
|                                                             | NA (pt does not have caregiver)                    | 0.0096  | 0.1048 | 1.01 | 0.9269 | 0.0841  | 0.1223 | 1.09 | 0.4918 | 0.2298  | 0.1566 | 1.26 | 0.1422 | 0.6050  | 0.2061 | 1.83 | 0.0033 | N/A     | N/A    | N/A  | N/A    |
|                                                             | Yes (primary or secondary caregiver lives with pt) | 0.0890  | 0.0276 | 1.09 | 0.0012 | 0.0752  | 0.0343 | 1.08 | 0.0284 | 0.1105  | 0.0462 | 1.12 | 0.0167 | 0.1087  | 0.0579 | 1.12 | 0.0605 | N/A     | N/A    | N/A  | N/A    |
| <b>EoL homecare (ref=pt does not have homecare)</b>         | Pt has homecare: nursing and/or personal support   | 0.3554  | 0.0147 | 1.43 | <.0001 | 0.5074  | 0.0186 | 1.66 | <.0001 | 0.5377  | 0.0258 | 1.71 | <.0001 | 0.5334  | 0.0351 | 1.71 | <.0001 | 0.7147  | 0.0448 | 2.04 | <.0001 |
| <b>Primary care physician</b>                               | Pt is not rostered                                 | -0.1991 | 0.0246 | 0.82 | <.0001 | -0.0966 | 0.0451 | 0.91 | 0.0322 | -0.1562 | 0.0550 | 0.86 | 0.0045 | N/A     | N/A    | N/A  | N/A    | N/A     | N/A    | N/A  | N/A    |

|                                |                                                   |        |        |      |        |        |        |       |        |        |        |       |        |        |        |       |        |        |        |       |        |
|--------------------------------|---------------------------------------------------|--------|--------|------|--------|--------|--------|-------|--------|--------|--------|-------|--------|--------|--------|-------|--------|--------|--------|-------|--------|
| <b>Palliative care (acute)</b> | Patient had palliative care in acute care setting | 2.0790 | 0.0163 | 8.00 | <.0001 | 2.5748 | 0.0221 | 13.13 | <.0001 | 2.7134 | 0.0300 | 15.08 | <.0001 | 2.8141 | 0.0393 | 16.68 | <.0001 | 2.8479 | 0.0493 | 17.25 | <.0001 |
| <b>Palliative care (home)</b>  | Patient had a home visit by a family physician    | N/A    | N/A    | N/A  | N/A    | 0.2274 | 0.0335 | 1.26  | <.0001 | 0.1201 | 0.0456 | 1.13  | 0.0085 | N/A    | N/A    | N/A   | N/A    | N/A    | N/A    | N/A   | N/A    |
| <b>LTC</b>                     | Patient is a resident of long term care           | 0.4577 | 0.0281 | 1.58 | <.0001 | 0.4998 | 0.0284 | 1.65  | <.0001 | 0.5687 | 0.0349 | 1.77  | <.0001 | 0.6528 | 0.0418 | 1.92  | <.0001 | 0.5756 | 0.0503 | 1.78  | <.0001 |

\* Hazard ratios are not shown because of the 2-way interaction between cancer type and cancer stage, meaning the association between cancer types and mortality varies for each level of stage, and vice versa; note the hazards are compared to the reference group (lung and stage 1 respectively).

**eFigure 1. Calibration Accuracy for 1-Year Survival**

**eFigure 1a. Year 0 Calibration accuracy for the 1-year survival probability. Patients grouped by deciles of predicted risk. C-index=0.902**

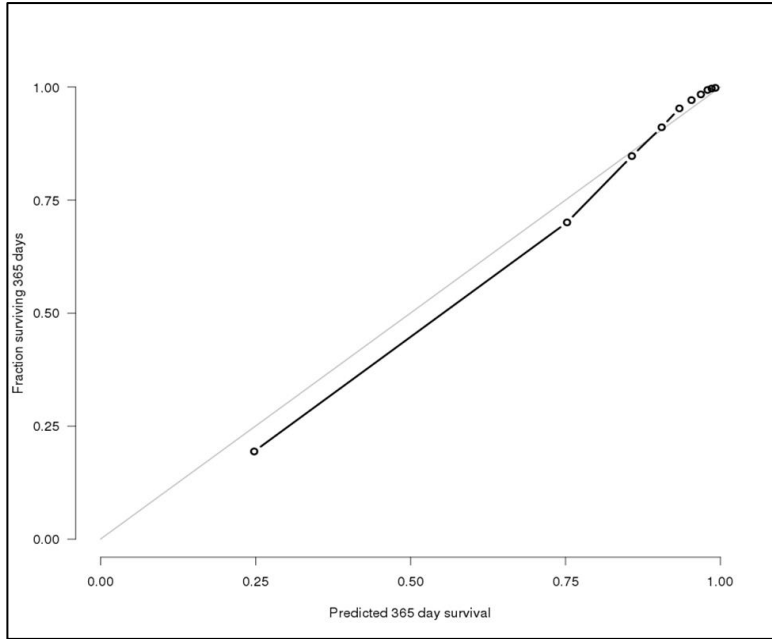

**eFigure 1b. Year 1 Calibration accuracy for the 1-year survival probability. Patients grouped by deciles of predicted risk. C-index=0.912**

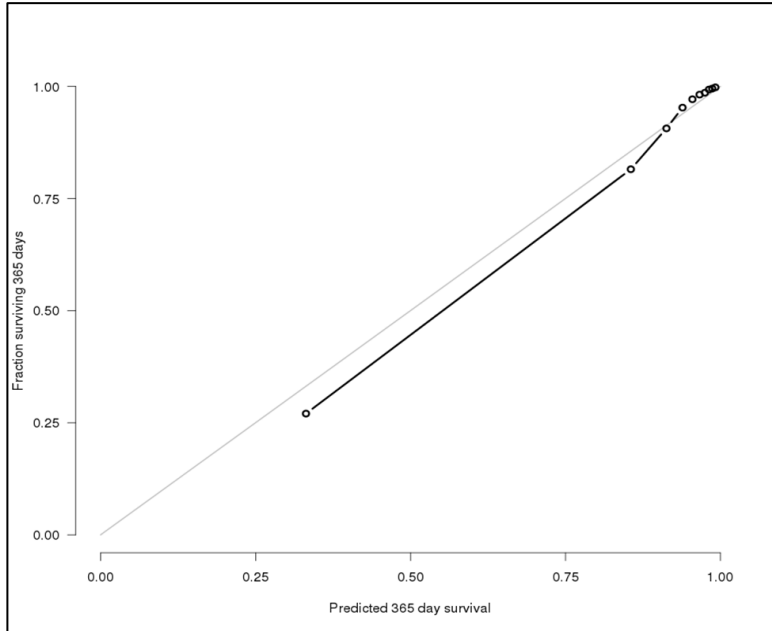

**eFigure 1c. Year 2 Calibration accuracy for the 1-year survival probability. Patients grouped by deciles of predicted risk. C-index=0.912**

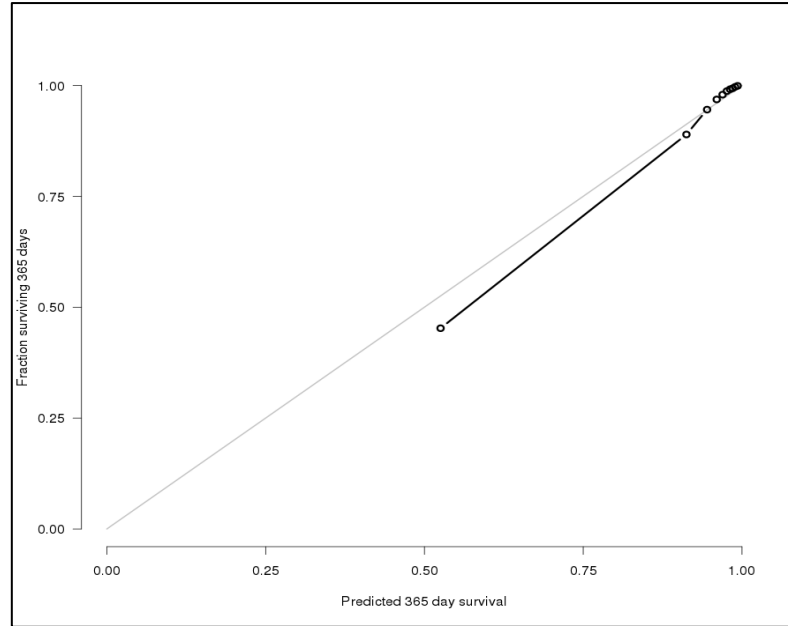

**eFigure 1d. Year 3 Calibration accuracy for the 1-year survival probability. Patients grouped by deciles of predicted risk. C-index=0.909**

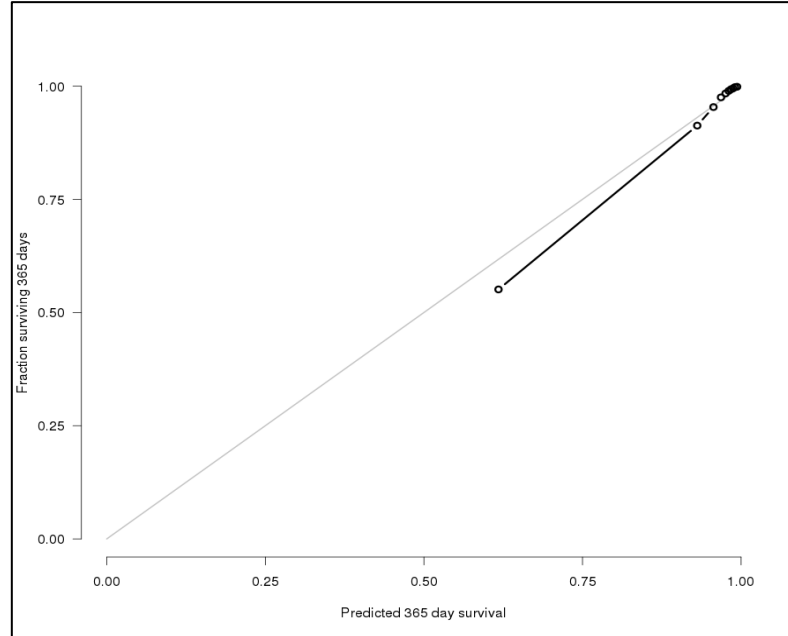

**eFigure 1e. Year 4 Calibration accuracy for the 1-year survival probability. Patients grouped by deciles of predicted risk. C-index=0.908**

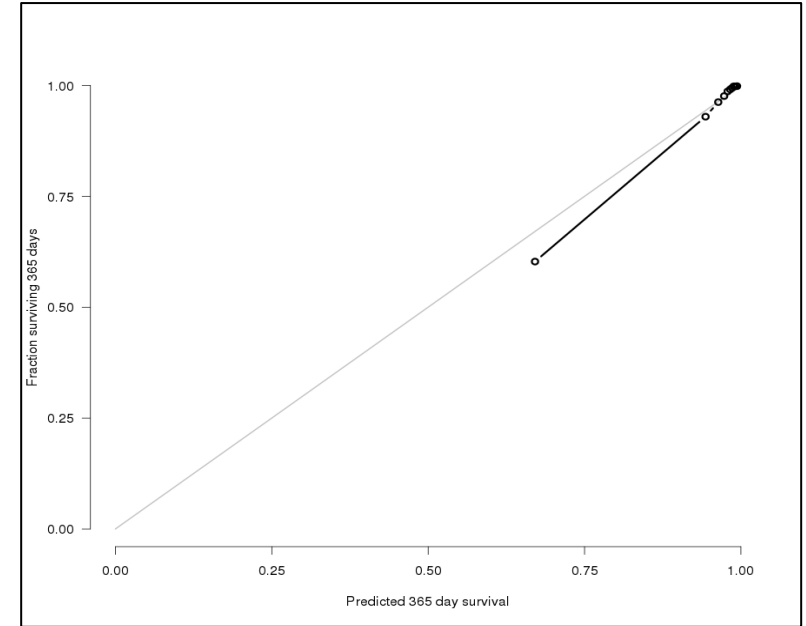

**eFigure 1f. Year 0 Calibration accuracy for the 5-year survival probability. Patients group by deciles of predicted risk. C-index=0.835**

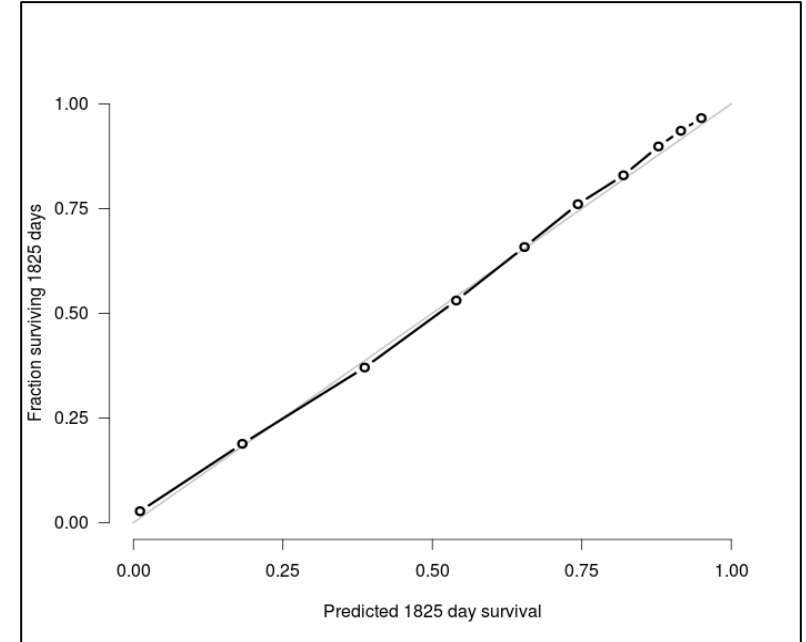

**eFigure 2. Kaplan Meier Survival Curve When Patients Grouped by Quintiles of 1-Year Predicted Risk of Death**

**eFigure 2a. Year 0 – Kaplan Meier survival curve when patients grouped by quintiles of 1-year predicted risk of death.**

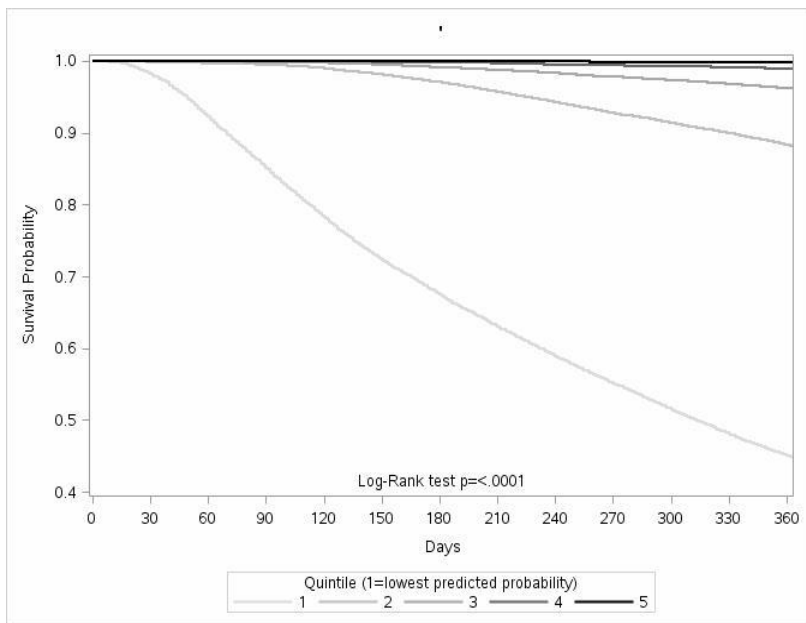

**eFigure 2b. Year 1 – Kaplan Meier survival curve when patients grouped by quintiles of 1-year predicted risk of death.**

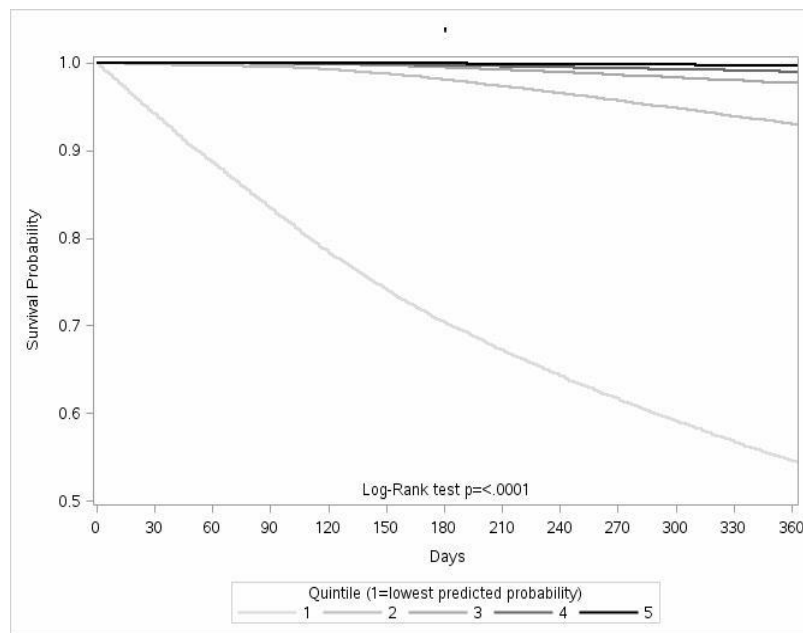

**eFigure 2c. Year 2 – Kaplan Meier survival curve when patients grouped by quintiles of 1-year predicted risk of death.**

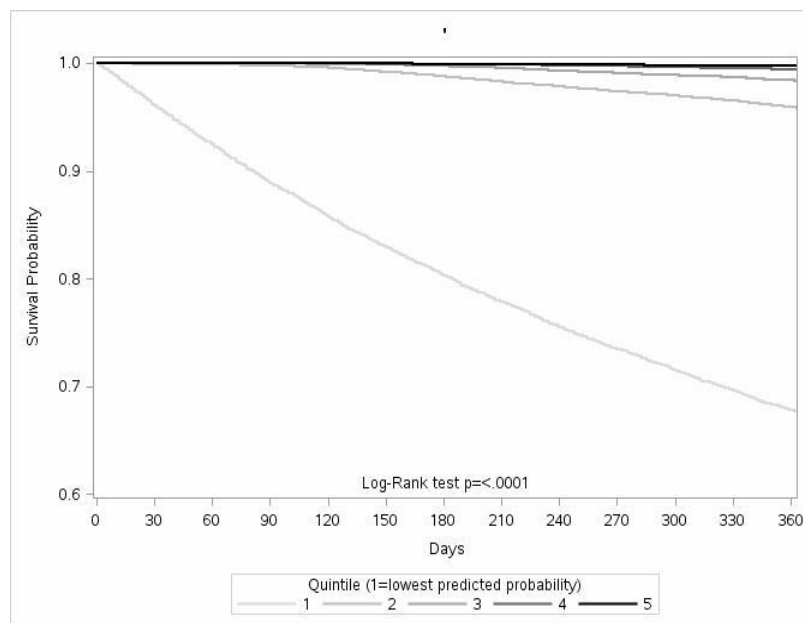

**eFigure 2d. Year 3 – Kaplan Meier survival curve when patients grouped by quintiles of 1-year predicted risk of death.**

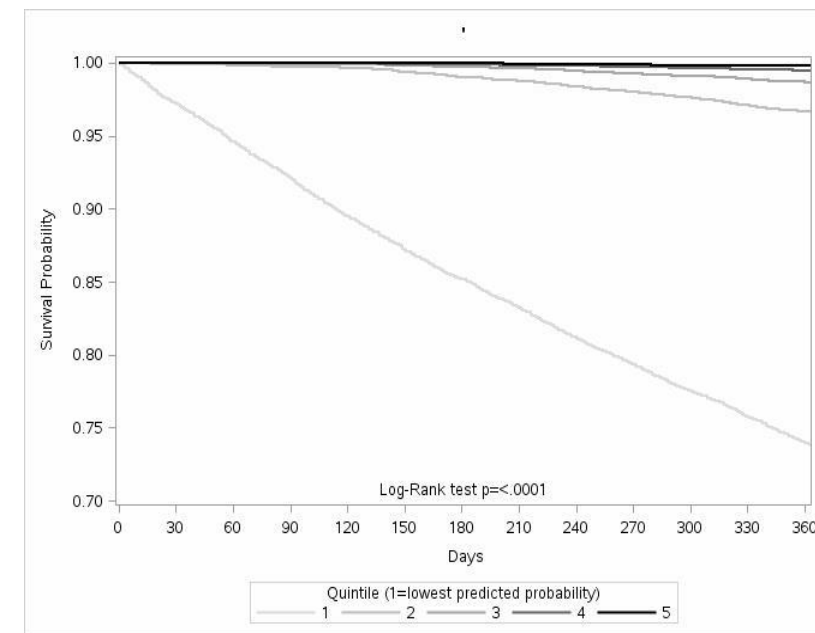

**eFigure 2e. Year 4 – Kaplan Meier survival curve when patients grouped by quintiles of 1-year predicted risk of death.**

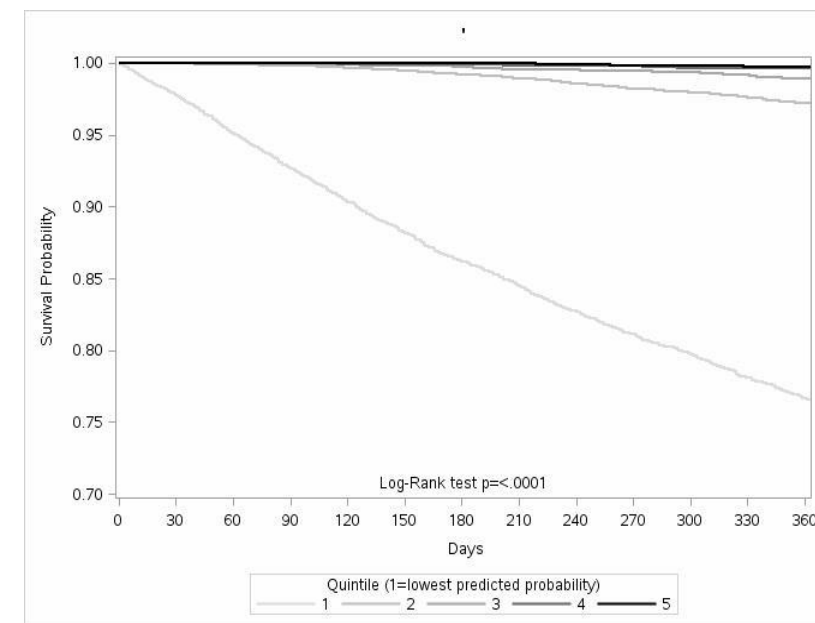

Supplement: jamanetwopen-3-e201768-s001.pdf [file jamanetwopen-3-e201768-s001.pdf]
